# Supplementary material for: Tigecycline and Gentamicin-Combined Treatment Enhances Renal Damage: Oxidative Stress, Inflammatory Reaction, and Apoptosis Interplay
Source: MDPI journal article supplement (doi:10.3390/ph15060736), 2022-06-10
Supplement: s1 [file s1]

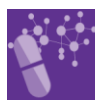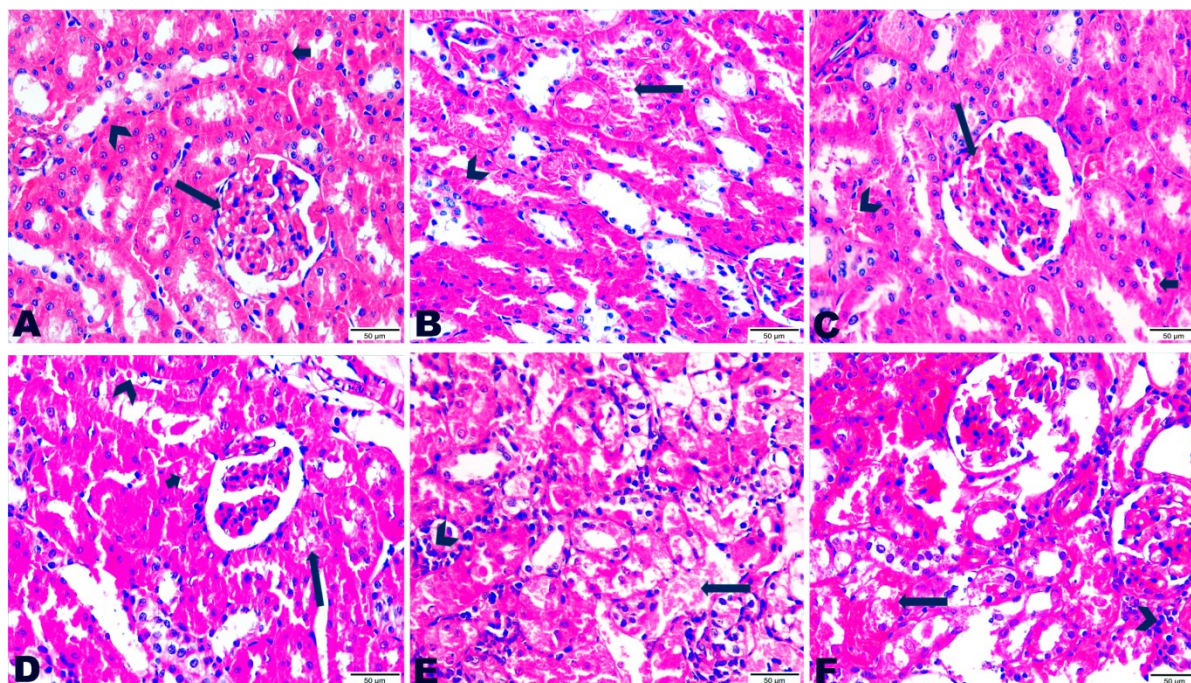

**Figure S1.** Photomicrographs presented histopathological changes of kidney sections between examined groups. **(A):** Control group. **(B):** TG7-treated group. **(C):** TG14-treated group. **(D):** GM-treated group. **(E and F):** TG7 + GM and TG14 + GM-treated groups, respectively. (H&E stain, x400 magnification, scale bar = 50 $\mu$ m).
